# Supplementary material for: Optimal Inventory Policies when Purchase Price and Demand Are Stochastic
Source: Atypon-hosted journal article supplement (doi:10.1287/opre.1100.0862), 2011-02-01
Supplement: opre.1100.0862-sm-ec.pdf [file opre.1100.0862-sm-ec.pdf]

**e - c o m p a n i o n**

ONLY AVAILABLE IN ELECTRONIC FORM

Electronic Companion—“Optimal Inventory Policies when Purchase Price and Demand Are Stochastic” by Peter Berling and Victor Martínez-de-Albéniz, *Operations Research*, doi 10.1287/opre.1100.0862.

---

# Online Appendix for “Optimal Inventory Policies when Purchase Price and Demand are Stochastic”

Peter Berling • Victor Martínez-de-Albéniz

## Proof of Theorem 1

**Proof.** Consider  $J^{n,\Delta}$  be a finite, discrete version of the problem. Specifically, for a fixed time interval  $\Delta$ , define

$$\begin{aligned} J^{0,\Delta} &\equiv 0 \\ J^{n+1,\Delta}(0, c) &= \min \left\{ \Pi(0) + e^c, b\Delta + e^{-r\Delta} \mathbb{E}_{\tilde{\epsilon}} J^{n,\Delta} \left( 0, c + \mu(c)\Delta + \sigma(c)\sqrt{\Delta}\tilde{\epsilon} \right) \right\} \\ J^{n+1,\Delta}(k, c) &= \min \left\{ \Pi(k) + e^c, e^{-r\Delta} \mathbb{E}_{\tilde{\epsilon}, \tilde{P}} J^{n,\Delta} \left( (k - \tilde{P})^+, c + \mu(c)\Delta + \sigma(c)\sqrt{\Delta}\tilde{\epsilon} \right) \right\} \text{ for } k \geq 1 \end{aligned}$$

where  $\tilde{\epsilon}$  is a random variable that takes values -1 and 1 with probability 1/2, and  $\tilde{P}$  is a variable that takes the value 1 with probability  $\lambda\Delta$  and 0 otherwise. Clearly, for all  $k$ , by value iteration, the limit when  $n \rightarrow \infty$  exists, denote it  $J^\Delta$ .  $J^\Delta$  exhibits a number of properties. All the results above are preserved when we consider  $J$ , since it is the limit of  $J^\Delta$  as  $\Delta \rightarrow 0$ .

$J^\Delta(k, \ln(C))$  **non-decreasing.** First, for  $\Delta$  small enough,  $c + \mu(c)\Delta + \sigma(c)\sqrt{\Delta}\tilde{\epsilon}$  is increasing in  $c$ , for all  $c, \tilde{\epsilon}$ . As a result, by a straightforward induction,  $J^\Delta(k, c)$  must be increasing in  $c$ . Furthermore, it is clear that  $J^\Delta(0, c) \leq \frac{b\Delta}{1 - e^{-r\Delta}}$  (never placing an order at  $k = 0$ ), i.e., bounded from above.

Second, select  $\Delta$  small enough, specifically such that, for all  $c, \tilde{\epsilon} = +1, -1$ ,

$$1 + \frac{d\mu}{dc}\Delta + \frac{d\sigma}{dc}\sqrt{\Delta}\tilde{\epsilon} \geq 0.$$

$J^\Delta(k, \ln(C))$  **concave.** We claim that  $J^\Delta(k, \ln(C))$  is concave in  $C$  for all  $k$ . This is shown after showing concavity of  $J^{n,\Delta}(k, \ln(C))$ , by induction on  $n$ .  $J^{0,\Delta}(k, \ln(C))$  is indeed concave. Assume it is concave for  $n \geq 0$ . Define, given  $n, \Delta$ , for each  $k, \tilde{\epsilon}, \tilde{P}$ ,  $\phi(C) = J^{n,\Delta} \left( (k - \tilde{P})^+, \ln(C) + \mu(\ln(C))\Delta + \sigma(\ln(C))\sqrt{\Delta}\tilde{\epsilon} \right)$ .

$$\phi'(C) = \frac{1}{C} \left( 1 + \frac{d\mu}{dc}\Delta + \frac{d\sigma}{dc}\sqrt{\Delta}\tilde{\epsilon} \right) \frac{\partial J^{n,\Delta}}{\partial c} \left( (k - \tilde{P})^+, \ln(C) + \mu(\ln(C))\Delta + \sigma(\ln(C))\sqrt{\Delta}\tilde{\epsilon} \right) \geq 0.$$

Since by induction  $J^{n,\Delta}(k, \ln(C))$  is concave in  $C$ , we must have that

$$-\frac{1}{C^2} \frac{\partial J^{n,\Delta}}{\partial c} (k, \ln(C)) + \frac{1}{C^2} \frac{\partial^2 J^{n,\Delta}}{\partial c^2} (k, \ln(C)) \leq 0.$$

This can be used to bound  $\phi''(C)$ :

$$\begin{aligned}
\phi''(C) &= \frac{1}{C^2} \left( \frac{d^2\mu}{dc^2} \Delta + \frac{d^2\sigma}{dc^2} \sqrt{\Delta} \tilde{\epsilon} - 1 - \frac{d\mu}{dc} \Delta - \frac{d\sigma}{dc} \sqrt{\Delta} \tilde{\epsilon} \right) \\
&\quad \times \frac{\partial J^{n,\Delta}}{\partial c} \left( (k - \tilde{P})^+, \ln(C) + \mu(\ln(C)) \Delta + \sigma(\ln(C)) \sqrt{\Delta} \tilde{\epsilon} \right) \\
&\quad + \frac{1}{C^2} \left( 1 + \frac{d\mu}{dc} \Delta + \frac{d\sigma}{dc} \sqrt{\Delta} \tilde{\epsilon} \right)^2 \frac{\partial^2 J^{n,\Delta}}{\partial c^2} \left( (k - \tilde{P})^+, \ln(C) + \mu(\ln(C)) \Delta + \sigma(\ln(C)) \sqrt{\Delta} \tilde{\epsilon} \right) \\
&\leq \frac{1}{C^2} \left[ \frac{d^2\mu}{dc^2} \Delta + \frac{d^2\sigma}{dc^2} \sqrt{\Delta} \tilde{\epsilon} - 1 - \frac{d\mu}{dc} \Delta - \frac{d\sigma}{dc} \sqrt{\Delta} \tilde{\epsilon} + \left( 1 + \frac{d\mu}{dc} \Delta + \frac{d\sigma}{dc} \sqrt{\Delta} \tilde{\epsilon} \right)^2 \right] \\
&\quad \times \frac{\partial J^{n,\Delta}}{\partial c} \left( (k - \tilde{P})^+, \ln(C) + \mu(\ln(C)) \Delta + \sigma(\ln(C)) \sqrt{\Delta} \tilde{\epsilon} \right) \\
&\leq \frac{1}{C^2} \left[ \left( \frac{d^2\sigma}{dc^2} + \frac{d\sigma}{dc} \right) \sqrt{\Delta} \tilde{\epsilon} + \left( \frac{d^2\mu}{dc^2} + \frac{d\mu}{dc} + \left( \frac{d\sigma}{dc} \right)^2 \right) \Delta + 2 \frac{d\mu}{dc} \frac{d\sigma}{dc} \Delta^{3/2} \tilde{\epsilon} + \left( \frac{d\mu}{dc} \right)^2 \Delta^2 \right] \\
&\quad \times \frac{\partial J^{n,\Delta}}{\partial c} \left( (k - \tilde{P})^+, \ln(C) + \mu(\ln(C)) \Delta + \sigma(\ln(C)) \sqrt{\Delta} \tilde{\epsilon} \right).
\end{aligned}$$

When  $\Delta$  is sufficiently small, the right-hand side is indeed negative for all  $\tilde{\epsilon}$  given that  $\frac{d^2\sigma}{dc^2} + \frac{d\sigma}{dc} = 0$  and  $\frac{d^2\mu}{dc^2} + \frac{d\mu}{dc} + \left( \frac{d\sigma}{dc} \right)^2 < 0$ . In addition, if  $\frac{d\sigma}{dc} = 0$  and  $\frac{d\mu}{dc} = 0$ , then  $\phi(C) = J^{n,\Delta} \left( (k - \tilde{P})^+, \ln(C) + \mu \Delta + \sigma \sqrt{\Delta} \tilde{\epsilon} \right)$  is directly concave. Thus, overall,  $\phi(C)$  is concave when, as stated in the lemma,  $\frac{d\sigma}{dc} = 0$  and  $\frac{d^2\mu}{dc^2} + \frac{d\mu}{dc} < 0$  or  $\frac{d\sigma}{dc} = 0$  and  $\frac{d\mu}{dc} = 0$ .

As a result, in the definition of  $J^{n+1,\Delta}(k, \ln(C)) = \min\{\Pi(k) + C, e^{-r\Delta} \mathbb{E}_{\tilde{\epsilon}} \phi(C)\}$ , the first term in brackets is linear, and the second term concave. Since the minimum of two concave functions is concave, then  $J^{n+1,\Delta}(k, \ln(C))$  is concave, and hence, at the limit,  $J^\Delta(k, \ln(C))$  is concave as well.

**Existence of  $c_k^{L,\Delta}, c_k^{H,\Delta}$ .** Thus, since  $J^\Delta(k, \ln(C))$  is concave, and in the limit it is the maximum of  $\Pi(k) + C$  and a concave function of  $C$ , it must be true that  $J^\Delta(k, \ln(C)) = \Pi(k) + C$  if and only if  $C_k^{L,\Delta} \leq C \leq C_k^{H,\Delta}$ . Equivalently, we have existence of  $c_k^{L,\Delta}, c_k^{H,\Delta}$  such that the order is placed if and only if  $c_k^{L,\Delta} \leq c \leq c_k^{H,\Delta}$ . Interestingly,  $c_k^L$  is non-decreasing in  $k$ , and  $c_k^H$  is non-increasing in  $k$ . Indeed, using the traditional approach for the problem, it is well-known that the optimal policy is a base-stock policy, dependent on  $c$ . This implies that at a given  $C = e^c$ , it is optimal to purchase up to some  $k$ , where  $k$  is the base-stock level. This automatically yields that  $c_k^H$  must be non-increasing, and  $c_k^L$  non-decreasing. ■

## Proof of Proposition 1

**Proof.** Consider  $J^{n,\Delta}$ ,  $J^\Delta$  and  $c_k^{L,\Delta}$ ,  $c_k^{H,\Delta}$ , defined in the previous proof. Interestingly, from Equation (3),

$$\begin{aligned}
& \lambda\Pi(k-1) - (r+\lambda)\Pi(k) \\
&= \frac{b}{r} \left[ \frac{\lambda^k}{(\lambda+r)^{k-1}} G(L, k-1, \lambda+r) - e^{-rL} \lambda G(L, k-1, \lambda) \right] \\
&+ \frac{h}{r} \left[ e^{-rL} \lambda \bar{G}(L, k-1, \lambda) - \frac{\lambda^k}{(\lambda+r)^{k-1}} \bar{G}(L, k-1, \lambda+r) \right] \\
&- \frac{b}{r} \left[ \frac{\lambda^k}{(\lambda+r)^{k-1}} G(L, k, \lambda+r) - e^{-rL} (\lambda+r) G(L, k, \lambda) \right] \\
&- \frac{h}{r} \left[ e^{-rL} (\lambda+r) \bar{G}(L, k, \lambda) - \frac{\lambda^k}{(\lambda+r)^{k-1}} \bar{G}(L, k, \lambda+r) \right] \\
&= \frac{b}{r} \left[ \frac{\lambda^k}{(\lambda+r)^{k-1}} \frac{[(\lambda+r)L]^{k-1}}{(k-1)!} e^{-(\lambda+r)L} - e^{-rL} \left( \lambda \frac{(\lambda L)^{k-1}}{(k-1)!} e^{-\lambda L} - r G(L, k, \lambda) \right) \right] \\
&+ \frac{h}{r} \left[ e^{-rL} \left( -\lambda \frac{(\lambda L)^{k-1}}{(k-1)!} e^{-\lambda L} - r \bar{G}(L, k, \lambda) \right) + \frac{\lambda^k}{(\lambda+r)^{k-1}} \frac{[(\lambda+r)L]^{k-1}}{(k-1)!} e^{-(\lambda+r)L} \right] \\
&= b e^{-rL} G(L, k, \lambda) - h e^{-rL} \bar{G}(L, k, \lambda)
\end{aligned}$$

Since  $G$  is decreasing in  $k$  and  $\bar{G} = 1 - G$ , this expression is non-increasing in  $k$ . Thus  $\lambda\Pi(k-1) - (r+\lambda)\Pi(k) \geq 0$  for  $k < k^\dagger$  for some  $k^\dagger$ .

We can now show (i). For  $k = 0$ , we have that

$$J^\Delta(0, c) = \min \left\{ \Pi(0) + e^c, b\Delta + e^{-r\Delta} \mathbb{E}_{\tilde{c}} J^\Delta \left( 0, c + \mu(c)\Delta + \sigma(c)\sqrt{\Delta}\tilde{c} \right) \right\}.$$

When  $C = 0$ , it is clear that the optimal policy is to place the order:  $J^\Delta(0, -\infty) = \Pi(0)$ , the minimum possible since the lead-time is  $L > 0$ . As a result,  $c_0^{L,\Delta} = -\infty$ .

For  $k \geq 1$ , we can use a similar argument. We show, by induction, that when  $k < k^\dagger$ ,  $c_k^{L,\Delta} = -\infty$ . If this is true up to  $k-1$ , for  $C \approx 0$ ,  $J(i, \ln(C)) = \Pi(i) + C$  for  $i \leq k-1$ .

Consider the decision at  $c$  close to  $-\infty$ , i.e.,  $C = 0$ . If  $c_k^{L,\Delta} > -\infty$ , then the order should not be placed now. In that case, the order is placed either when the price reaches  $c = c_k^{L,\Delta}$ , which occurs after a stochastic time  $T$ , or when an arrival occurs, after a stochastic time  $E_1$ . The realized discounted cost is thus  $e^{-rE_1}(\Pi(k-1) + C(E_1))1_{E_1 < T} + e^{-rT}(\Pi(k) + c_k^{L,\Delta})1_{E_1 < T}$ . Since  $E_1$  and  $T$  are independent (one is related to arrivals, the other to price evolution), the expectation with respect to  $E_1$  is

$$\begin{aligned}
& \int_0^T \lambda e^{-\lambda s} e^{-rs} (\Pi(k-1) + C(s)) ds + \int_T^\infty \lambda e^{-\lambda s} e^{-rT} (\Pi(k) + c_k^{L,\Delta}) ds \\
&\geq \int_0^T \lambda e^{-\lambda s} e^{-rs} \Pi(k-1) ds + \int_T^\infty \lambda e^{-\lambda s} e^{-rT} \Pi(k) ds \\
&= \frac{\lambda(1 - e^{-(r+\lambda)T})}{r+\lambda} \Pi(k-1) + e^{-(r+\lambda)T} \Pi(k) \\
&\geq \Pi(k)
\end{aligned}$$

where the last inequality is found using that  $\lambda\Pi(k-1) - (r+\lambda)\Pi(k) \geq 0$ . Thus, the cost of such strategy is higher than placing the order at  $C = 0$ . Hence,  $c_k^{L,\Delta} = -\infty$ . This completes the induction.

We prove now (ii). Consider now the first  $k$  such that  $\lambda\Pi(k-1) - (r+\lambda)\Pi(k) = -(r+\lambda)M < 0$ . This is  $k = k^\dagger$ . Consider the policy of never ordering if no arrival occurs. The expected discounted cost is then

$$\begin{aligned} & \mathbb{E} \left\{ \int_0^\infty \lambda e^{-\lambda s} e^{-rs} J(k-1, \ln(C(s))) ds \right\} \\ & \leq \int_0^\infty \lambda e^{-\lambda s} e^{-rs} (\Pi(k-1) + \mathbb{E}C(s)) ds \\ & = \frac{\lambda}{r+\lambda} \Pi(k-1) + \int_0^\infty \lambda e^{-\lambda s} e^{-rs} \mathbb{E}C(s) ds \\ & < \Pi(k) + C(0) - M + \int_0^\infty \lambda e^{-\lambda s} e^{-rs} \mathbb{E}C(s) ds - C(0) \end{aligned}$$

If for all  $C(0) \leq b/r$ ,  $\int_0^\infty \lambda e^{-\lambda s} e^{-rs} \mathbb{E}C(s) ds - C(0) \leq M$ , then it is clear that not placing an order outperforms placing one. Also, if  $C(0) > b/r$  it is better not to place an order, as it is cheaper to keep paying the back-ordering cost. Thus,  $c_k^{H,\Delta} = -\infty$ .

Hence, the optimal policy can be defined such that an order is placed if and only if  $c \leq c_k^{H,\Delta}$ .  $c_k^{H,\Delta}$  is finite for  $k < k^\dagger$ , and  $-\infty$  for  $k \geq k^\dagger$ . The same holds true as we let  $\Delta \rightarrow 0$ . ■

## Proof of Proposition 2

**Proof.** Let us proof  $\int_0^\infty \lambda e^{-\lambda s} e^{-rs} \mathbb{E}C(s) ds - C(0) \leq M$  for all  $C(0) \leq b/r$ . Furthermore, to simplify notation we denote  $C(0)$  with just  $C$  in the remainder of the proof.

Let us first consider case (a), the geometric Brownian motion model. Define

$$\begin{aligned} m &= \int_0^\infty \lambda e^{-\lambda s} e^{-rs} \mathbb{E}C(s) ds - C \\ &= C \cdot \left( \int_0^\infty \lambda e^{-\lambda s} e^{-rs} e^{(\mu+\sigma^2/2)s} ds - 1 \right) \\ &= C \cdot \left( \frac{\lambda}{r+\lambda - (\mu + \sigma^2/2)} - 1 \right) \end{aligned}$$

The expression above is negative for any  $C$  if  $\mu + \sigma^2/2 \leq r$  (and thus is smaller than  $M$ ). If  $\mu + \sigma^2/2 > r$ , then it is increasing in  $C$ . We must make sure that its value at  $C = b/r$  is less or equal to  $M$ , i.e.,

$$\frac{\lambda}{r+\lambda - (\mu + \sigma^2/2)} - 1 \leq \frac{rM}{b},$$

which is equivalent to the condition in the proposition.

Let us now consider case (b), the Ornstein-Uhlenbeck process. Let

$$\begin{aligned} m &= \int_0^\infty \lambda e^{-\lambda s} e^{-rs} \mathbb{E}C(s) ds - C \\ &= \int_0^\infty \lambda e^{-\lambda s} e^{-rs} \cdot C \cdot \exp \left[ -(\ln(C) - \bar{c}) (1 - e^{-\kappa s}) + \frac{\sigma^2}{4\kappa} (1 - e^{-2\kappa s}) \right] ds - C \end{aligned}$$

If  $\ln(C) \geq \bar{c}$  then  $\mathbb{E}C(s) \leq C$  for all  $s$ , and it follows directly that  $m < 0 < M$ .

If  $\ln(C) < \bar{c}$  then the inequality  $m < M$  is satisfied depending on the relationship between  $\lambda$ ,  $r$ ,  $\kappa$  and  $\sigma$ .

We can obtain a first bound by using that  $1 - e^{-\kappa s} \leq 1$ ,  $1 - e^{-2\kappa s} \leq 1$  and  $-C \leq 0$ :

$$\begin{aligned} m &\leq \int_0^\infty \lambda e^{-\lambda s} e^{-rs} e^{\bar{c} + \frac{\sigma^2}{4\kappa}} ds \\ &= \frac{\lambda}{\lambda + r} e^{\bar{c} + \frac{\sigma^2}{4\kappa}} \end{aligned}$$

If condition (b1) is true, then the above inequality proves that  $m \leq M$ .

A second bound can be found by noting that  $1 - e^{-\kappa s} \leq 1$ ,  $1 - e^{-2\kappa s} \leq 2\kappa s$  and  $-C \leq 0$ :

$$\begin{aligned} m &\leq \int_0^\infty \lambda e^{-\lambda s} e^{-rs} e^{\bar{c}} e^{\frac{\sigma^2}{2}s} ds \\ &= \frac{\lambda}{\lambda + r - \frac{\sigma^2}{2}} e^{\bar{c}} \end{aligned}$$

Condition (b2) implies that  $m \leq M$ . Note that obtaining tighter bounds is possible by maximizing  $m$  over  $C \leq b/r$ . ■

## Proof of Theorem 2

**Proof.** We show the theorem by recursion on  $k$ . The structure is true for  $k = 0$ , as presented in Equation (11). For  $k \geq 1$ , first, Theorem 1 establishes the existence of  $c_k^H$ . For  $c_k^L \leq c \leq c_k^H$ ,  $J(k, c) = \Pi(k) + e^c$ . For  $c \geq c_k^H$ ,  $J(k, c)$  satisfies Equation (7). We verify that the proposed formulation, in interval  $[c_i^H, c_{i-1}^H]$ ,  $i \geq 1$ , i.e.,

$$J(k, c) = M_{k,i} + N_{k,i}e^c + \left( A_{k,i}^0 + A_{k,i}^1 c + \dots + A_{k,i}^{k-1} c^{k-1} \right) e^{-\alpha c} + \left( B_{k,i}^0 + B_{k,i}^1 c + \dots + B_{k,i}^{k-1} c^{k-1} \right) e^{\beta c}$$

satisfies the differential equation:

$$\begin{aligned} 0 = & -(r + \lambda)J(k, c) + \lambda J(k-1, c) + \mu \frac{dJ}{dc}(k, c) + \frac{\sigma^2}{2} \frac{d^2 J}{dc^2}(k, c) \\ = & \lambda \left[ M_{k-1,i} + N_{k-1,i}e^c + \left( A_{k-1,i}^0 + A_{k-1,i}^1 c + \dots + A_{k-1,i}^{k-2} c^{k-2} \right) e^{-\alpha c} \right. \\ & \left. + \left( B_{k-1,i}^0 + B_{k-1,i}^1 c + \dots + B_{k-1,i}^{k-2} c^{k-2} \right) e^{\beta c} \right] \\ & - (r + \lambda) \left[ M_{k,i} + N_{k,i}e^c + \left( A_{k,i}^0 + A_{k,i}^1 c + \dots + A_{k,i}^{k-1} c^{k-1} \right) e^{-\alpha c} \right. \\ & \left. + \left( B_{k,i}^0 + B_{k,i}^1 c + \dots + B_{k,i}^{k-1} c^{k-1} \right) e^{\beta c} \right] \\ & + \mu \left[ N_{k,i}e^c - \alpha \left( A_{k,i}^0 + A_{k,i}^1 c + \dots + A_{k,i}^{k-1} c^{k-1} \right) e^{-\alpha c} + \left( A_{k,i}^1 + \dots + (k-1)A_{k,i}^{k-1} c^{k-2} \right) e^{-\alpha c} \right. \\ & \left. + \beta \left( B_{k,i}^0 + B_{k,i}^1 c + \dots + B_{k,i}^{k-1} c^{k-1} \right) e^{\beta c} + \left( B_{k,i}^1 + \dots + (k-1)B_{k,i}^{k-1} c^{k-2} \right) e^{\beta c} \right] \\ & + \frac{\sigma^2}{2} \left[ \begin{aligned} & N_{k,i}e^c + \alpha^2 \left( A_{k,i}^0 + A_{k,i}^1 c + \dots + A_{k,i}^{k-1} c^{k-1} \right) e^{-\alpha c} \\ & - 2\alpha \left( A_{k,i}^1 + \dots + (k-1)A_{k,i}^{k-1} c^{k-2} \right) e^{-\alpha c} + \left( 2A_{k,i}^2 + \dots + (k-2)(k-1)A_{k,i}^{k-1} c^{k-3} \right) e^{-\alpha c} \\ & + \beta^2 \left( B_{k,i}^0 + B_{k,i}^1 c + \dots + B_{k,i}^{k-1} c^{k-1} \right) e^{\beta c} + 2\beta \left( B_{k,i}^1 + \dots + (k-1)B_{k,i}^{k-1} c^{k-2} \right) e^{\beta c} \\ & + \left( 2B_{k,i}^2 + \dots + (k-2)(k-1)B_{k,i}^{k-1} c^{k-3} \right) e^{\beta c} \end{aligned} \right] \end{aligned}$$

Simple identification of terms yields that

$$M_{k,i} = \frac{\lambda M_{k-1,i}}{r + \lambda} \text{ and } N_{k,i} = \frac{\lambda N_{k-1,i}}{(r + \lambda) - \mu - \frac{\sigma^2}{2}},$$

and in addition, since  $(r + \lambda) + \mu\alpha - \frac{\sigma^2}{2}\alpha^2 = 0$  and  $(r + \lambda) - \mu\beta - \frac{\sigma^2}{2}\beta^2 = 0$ ,

$$\begin{aligned} \lambda A_{k-1,i}^j &= \left[ (r + \lambda) + \mu\alpha - \frac{\sigma^2}{2}\alpha^2 \right] A_{k,i}^j + \left[ -\mu(j + 1) + \frac{\sigma^2}{2}2\alpha(j + 1) \right] A_{k,i}^{j+1} + \left[ -\frac{\sigma^2}{2}(j + 1)(j + 2) \right] A_{k,i}^{j+2} \\ &= \left[ -\mu(j + 1) + \frac{\sigma^2}{2}2\alpha(j + 1) \right] A_{k,i}^{j+1} + \left[ -\frac{\sigma^2}{2}(j + 1)(j + 2) \right] A_{k,i}^{j+2}, \\ \lambda B_{k-1,i}^j &= \left[ (r + \lambda) - \mu\beta - \frac{\sigma^2}{2}\beta^2 \right] B_{k,i}^j + \left[ -\mu(j + 1) - \frac{\sigma^2}{2}2\beta(j + 1) \right] B_{k,i}^{j+1} + \left[ -\frac{\sigma^2}{2}(j + 1)(j + 2) \right] B_{k,i}^{j+2} \\ &= \left[ -\mu(j + 1) - \frac{\sigma^2}{2}2\beta(j + 1) \right] B_{k,i}^{j+1} + \left[ -\frac{\sigma^2}{2}(j + 1)(j + 2) \right] B_{k,i}^{j+2}. \end{aligned}$$

Solving these equations provides an expression of  $A_{k,i}^j, B_{k,i}^j$  for  $j \geq 1$ . One can see that the expression provided in the theorem satisfies the differential equation for all  $A_{k,i}^0, B_{k,i}^0$ .

Furthermore, when  $c \geq c_0^H$ , the same argument yields

$$M_{k,0} = \frac{\lambda M_{k-1,0}}{r + \lambda} \text{ and } N_{k,0} = \frac{\lambda N_{k-1,0}}{(r + \lambda) + \mu\alpha_0 - \frac{\sigma^2}{2}\alpha_0^2},$$

and

$$\begin{aligned} \lambda A_{k-1,0}^j &= \left[ (r + \lambda) + \mu\alpha - \frac{\sigma^2}{2}\alpha^2 \right] A_{k,0}^j + \left[ -\mu(j + 1) + \frac{\sigma^2}{2}2\alpha(j + 1) \right] A_{k,0}^{j+1} + \left[ -\frac{\sigma^2}{2}(j + 1)(j + 2) \right] A_{k,0}^{j+2} \\ &= \left[ -\mu(j + 1) + \frac{\sigma^2}{2}2\alpha(j + 1) \right] A_{k,0}^{j+1} + \left[ -\frac{\sigma^2}{2}(j + 1)(j + 2) \right] A_{k,0}^{j+2}. \end{aligned}$$

Finally, in order to have  $J(k, c)$  continuously differentiable at  $c_k^H, \dots, c_0^H$ , we must satisfy  $2(k + 1)$  equations (twice for each break-point). We can do so by adjusting  $A_{k,0}^0, A_{k,1}^0, B_{k,1}^0, \dots, A_{k,k}^0, B_{k,k}^0$  and  $c_k, 2(k + 1)$  variables. ■

## Proof of Theorem 3

**Proof.** We prove the theorem by induction.

First of all, we are interested in solving Equation (15) to characterize  $J(k, c)$ . Letting  $\phi(x) = J(k, c - \bar{c}) - \frac{b}{r} \left( \frac{\lambda}{r + \lambda} \right)^k$ , the differential equation can be reformulated into (17). Since this is a second-order differential equation, the solution to it can be expressed as the sum of a particular solution, plus a combination of solutions to (16). We are only interested in solutions that are not divergent, and hence the only candidate solution to (16) is a constant times  $\psi_1$ .

For  $k = 1$ , we know the expression of  $J(0, c)$ , provided in (14). For  $x \geq c_0^H - \bar{c}$ ,  $J(0, x + \bar{c}) - \frac{b}{r} = A_0\psi_0(x)$ . As a result, since  $\psi_0$  solves Equation (13),  $A_0\psi_0(x)$  is a convergent solution of (17) for

$x \geq c_0^H - \bar{c}$ . Expanding the solution of the differential equation to  $x \leq c_0^H - \bar{c}$  provides  $\theta_1$ , a particular solution to (17). Thus,  $J(1, c)$  can be characterized as

$$\frac{b}{r} \left( \frac{\lambda}{r + \lambda} \right) + \theta_1(c - \bar{c}) + A_1 \psi_1(c - \bar{c})$$

for  $c \geq c_1^H$ , and  $\Pi(1) + e^c$  for  $c_1^L \leq c \leq c_1^H$ .  $A_1, c_1^H$  are determined so that  $J(1, c)$  is continuously differentiable at  $c_1^H$ .

Assuming that the theorem is true for  $k - 1 \geq 1$ , then we claim that it also holds for  $k$ . We need a particular convergent solution to (17):

$$-(r + \lambda)\theta - \kappa x \theta' + \frac{\sigma^2}{2} \theta'' = -\lambda \phi_{k-1}$$

where  $\phi_{k-1}(x) = J(k - 1, x + \bar{c}) - \frac{b}{r} \left( \frac{\lambda}{r + \lambda} \right)^{k-1} = \theta_{k-1} + A_{k-1} \psi_1$ . Since  $\lim_{x \rightarrow \infty} \phi_{k-1}(x) = 0$  by construction, we can find a particular solution that is convergent, as for  $\theta'(0)$  higher than a threshold, the solution diverges to  $+\infty$  and for  $\theta'(0)$  smaller than that threshold, it diverges to  $-\infty$ . Thus, we can express the solution to Equation (15) as

$$\frac{b}{r} \left( \frac{\lambda}{r + \lambda} \right)^k + \theta_k(c - \bar{c}) + A_k \psi_1(c - \bar{c}),$$

and yields (18). This completes the induction. ■
